# Supplementary material
Source: PubMed Central journal article supplement (PMC7325432)

**Table S1.** Kinetic parameters derived from fits to the heme trafficking data using Equation 2. The values indicated represent the mean  $\pm$  SD of independent triplicate cultures. \* $p < 0.05$ , \*\* $p < 0.01$ , \*\*\* $p < 0.001$  by one-way ANOVA with Dunnett's post-hoc test. Red asterisks indicate statistical significance relative to the cytosol within a given strain. Black asterisks indicate statistical significance relative to the WT strain of a given compartment.

**Table S1.**

| Strain                  | Location | $t_{1/2}$<br>(min) | $k$<br>( $\text{min}^{-1}$ ) | Amplitude<br>(% Bound) | Lag Time<br>(min) | Figure  | Goodness of Fit<br>( $R^2$ ) |
|-------------------------|----------|--------------------|------------------------------|------------------------|-------------------|---------|------------------------------|
| WT                      | Cyt      | 86(4)              | .032(.003)                   | 93(5)                  | 24(4)             | Fig. 2e | .9908                        |
|                         | Nuc      | 75(3)*             | .041(.002)*                  | 87(4)                  | 26(3)             |         | .9851                        |
|                         | Mito     | 89(4)              | .034(.003)                   | 88(5)                  | 29(4)             |         | .9942                        |
| <i>hem1Δ</i> +<br>ALA   | Cyt      | 171(7)             | .030(.003)                   | 86(7)                  | 104(7)            | Fig. 3a | .9596                        |
|                         | Nuc      | 150(2)***          | .059(.005)***                | 108(5)*                | 113(2)            |         | .9739                        |
|                         | Mito     | 173(9)             | .028(.004)                   | 75(8)                  | 102(9)            |         | .9445                        |
| WT                      | Cyt      | 92(2)              | .033(.001)                   | 75(5)                  | 31(2)             | Fig. 5a | .9926                        |
|                         | Nuc      | 84(3)*             | .039(.002)*                  | 91(6)*                 | 33(3)             |         | .9724                        |
|                         | Mito     | 93(2)              | .033(.002)                   | 75(4)                  | 32(2)             |         | .9914                        |
| <i>mgm1Δ</i>            | Cyt      | 90(4)              | .034(.002)                   | 74(6)                  | 31(4)             | Fig. 5a | .9901                        |
|                         | Nuc      | 42(9)***/***       | .02(.01)                     | 27(5)***/***           | 20(5)*/*          |         | .5293                        |
|                         | Mito     | 85(5)              | .037(.003)                   | 77(6)                  | 31(5)             |         | .9908                        |
| WT                      | Cyt      | 97(3)              | .033(.002)                   | 85(6)                  | 36(3)             | Fig. 5c | .9805                        |
|                         | Nuc      | 82(4)*             | .041(.001)*                  | 105(5)*                | 33(4)             |         | .9779                        |
|                         | Mito     | 99(3)              | .034(.003)                   | 82(4)                  | 40(3)             |         | .9668                        |
| <i>rho</i> <sup>0</sup> | Cyt      | 85(2)              | .035(.002)                   | 98(5)                  | 27(2)             | Fig. 5c | .9797                        |
|                         | Nuc      | 77(2)*             | .044(.003)*                  | 99(4)                  | 31(2)             |         | .9768                        |
|                         | Mito     | 96(3)              | .034(.002)                   | 93(5)                  | 37(3)             |         | .9795                        |
| WT                      | Cyt      | 87(2)              | .033(.002)                   | 80(4)                  | 26(2)             | Fig. 5e | .9854                        |
|                         | Nuc      | 78(3)*             | .042(.002)*                  | 100(6)*                | 30(3)             |         | .9692                        |
|                         | Mito     | 93(3)              | .030(.002)                   | 78(4)                  | 26(3)             |         | .9783                        |
| <i>fzo1Δ</i>            | Cyt      | 89(2)              | .033(.002)                   | 87(5)                  | 28(2)             | Fig. 5e | .9888                        |
|                         | Nuc      | 79(2)*             | .039(.002)*                  | 95(4)                  | 28(2)             |         | .9805                        |
|                         | Mito     | 89(2)              | .032(.002)                   | 90(4)                  | 27(2)             |         | .9897                        |
| WT                      | Cyt      | 85(3)              | .031(.001)                   | 87(4)                  | 20(3)             | Fig. 5g | .9908                        |
|                         | Nuc      | 75(2)*             | .041(.002)*                  | 94(5)                  | 26(2)             |         | .9840                        |
|                         | Mito     | 87(2)              | .031(.002)                   | 75(3)                  | 22(2)             |         | .9867                        |
| <i>ugo1Δ</i>            | Cyt      | 100(4)             | .028(.003)                   | 95(4)                  | 28(4)             | Fig. 5g | .9924                        |
|                         | Nuc      | 77(3)*             | .039(.002)*                  | 102(6)                 | 25(3)             |         | .9854                        |
|                         | Mito     | 96(3)              | .028(.001)                   | 96(4)                  | 25(3)             |         | .9906                        |
| WT                      | Cyt      | 89(2)              | .030(.002)                   | 88(4)                  | 22(2)             | Fig. 5i | .9889                        |
|                         | Nuc      | 75(2)*             | .041(.002)*                  | 105(5)*                | 26(3)             |         | .9873                        |
|                         | Mito     | 92(2)              | .032(.002)                   | 83(4)                  | 28(2)             |         | .9824                        |
| <i>pcp1Δ</i>            | Cyt      | 85(2)              | .033(.002)                   | 90(4)                  | 24(2)             | Fig. 5i | .9872                        |
|                         | Nuc      | 69(3)*             | .045(.003)*                  | 105(6)                 | 24(3)             |         | .9898                        |
|                         | Mito     | 90(3)              | .034(.001)                   | 86(5)                  | 31(3)             |         | .9859                        |
| WT                      | Cyt      | 119(3)             | .033(.003)                   | 78(5)                  | 58(3)             | Fig. 5k | .9886                        |
|                         | Nuc      | 110(4)             | .041(.003)*                  | 96(5)*                 | 61(4)             |         | .9488                        |
|                         | Mito     | 111(3)             | .033(.002)                   | 80(4)                  | 50(3)             |         | .9767                        |
| <i>mic60Δ</i>           | Cyt      | 114(3)             | .033(.003)                   | 78(6)                  | 54(3)             | Fig. 5k | .9874                        |
|                         | Nuc      | 104(3)             | .039(.003)*                  | 96(5)*                 | 53(3)             |         | .9686                        |
|                         | Mito     | 114(2)             | .031(.002)                   | 81(4)                  | 50(2)             |         | .9876                        |
| WT                      | Cyt      | 102(3)             | .030(.002)                   | 80(4)                  | 35(3)             | Fig. 6a | .9833                        |
|                         | Nuc      | 88(4)*             | .038(.002)*                  | 85(6)                  | 35(4)             |         | .9449                        |
|                         | Mito     | 99(4)              | .031(.001)                   | 75(5)                  | 34(4)             |         | .9778                        |
| <i>dnm1Δ</i>            | Cyt      | 80(2)              | .038(.002)*                  | 93(4)                  | 27(2)             | Fig. 6a | .9874                        |
|                         | Nuc      | 64(2)*/*           | .055(.003)****               | 105(5)*                | 27(2)             |         | .9669                        |
|                         | Mito     | 82(2)              | .036(.002)*                  | 93(3)                  | 26(2)             |         | .9885                        |
| WT                      | Cyt      | 86(2)              | .032(.002)                   | 87(3)                  | 24(2)             | Fig. 6c | .9876                        |
|                         | Nuc      | 75(3)*             | .042(.003)*                  | 93(4)                  | 27(3)             |         | .9827                        |
|                         | Mito     | 89(2)              | .033(.002)                   | 84(3)                  | 28(2)             |         | .9931                        |
| <i>fis1Δ</i>            | Cyt      | 92(2)              | .032(.002)                   | 84(3)                  | 30(2)             | Fig. 6c | .9898                        |
|                         | Nuc      | 83(3)*             | .040(.001)*                  | 95(5)                  | 33(3)             |         | .9714                        |
|                         | Mito     | 95(3)              | .032(.002)                   | 80(4)                  | 32(3)             |         | .9820                        |

|                              |      |            |                |          |        |         |       |
|------------------------------|------|------------|----------------|----------|--------|---------|-------|
| WT                           | Cyt  | 132(7)     | .018(.002)     | 80(4)    | 21(7)  | Fig. 6e | .9756 |
|                              | Nuc  | 78(2)*     | .035(.002)***  | 107(5)*  | 21(2)  |         | .9800 |
|                              | Mito | 115(10)    | .021(.001)     | 90(3)    | 20(10) |         | .9880 |
| <i>caf4Δ</i><br><i>mdv1Δ</i> | Cyt  | 144(9)     | .017(.002)     | 79(5)    | 26(9)  | Fig. 6e | .9836 |
|                              | Nuc  | 81(4)*     | .031(.002)***  | 104(6)*  | 17(4)  |         | .9754 |
|                              | Mito | 137(4)     | .020(.001)     | 95(6)*   | 37(4)  |         | .9887 |
| WT                           | Nuc  | 114(5)     | .034(.005)     | 60(5)    | 55(5)  | Fig. 6g | .9599 |
| <i>dnm1Δ</i>                 | Nuc  | 100(7)*    | .050(.003)**   | 103(7)** | 57(7)  | Fig. 6g | .9439 |
| <i>mgm1Δ</i>                 | Nuc  | 82(4)*     | .010(.004)**   | 26(3)*** | 48(4)  | Fig. 6g | .6445 |
| <i>dnm1Δ</i><br><i>mgm1Δ</i> | Nuc  | 99(5)      | .032(.003)     | 69(4)    | 36(5)  | Fig. 6g | .9402 |
| WT                           | Cyt  | 95(3)      | .031(.002)     | 80(4)    | 34(3)  | Fig. 4a | .9814 |
|                              | Nuc  | 88(4)*/*   | .041(.003)*    | 90(3)    | 37(4)  |         | .9403 |
|                              | Mito | 93(3)      | .032(.002)     | 87(3)    | 31(3)  |         | .9833 |
| <i>gem1Δ</i>                 | Cyt  | 87(4)      | .031(.001)     | 86(3)    | 21(4)  | Fig. 4a | .9890 |
|                              | Nuc  | 61(4)**/** | .051(.002)**/* | 104(5)*  | 17(4)  |         | .9753 |
|                              | Mito | 93(3)      | .033(.002)     | 77(6)    | 30(3)  |         | .9837 |
| WT                           | Cyt  | 99(3)      | .031(.002)     | 81(3)    | 35(3)  | Fig. 4c | .9724 |
|                              | Nuc  | 89(4)*     | .039(.003)*    | 93(3)*   | 37(4)  |         | .9580 |
|                              | Mito | 96(4)      | .033(.002)     | 79(3)    | 35(4)  |         | .9696 |
| <i>mdm12Δ</i>                | Cyt  | 113(4)     | .028(.002)     | 84(3)    | 41(4)  | Fig. 4c | .9830 |
|                              | Nuc  | 101(5)     | .035(.002)*    | 100(5)*  | 43(5)  |         | .9481 |
|                              | Mito | 109(4)     | .029(.003)     | 70(3)    | 40(4)  |         | .9669 |
| WT                           | Cyt  | 33(3)      | .029(.001)     | 91(3)    | 0      | Fig. 4e | .9947 |
|                              | Nuc  | 19(3)**    | .045(.002)**   | 106(5)*  | 0      |         | .9775 |
|                              | Mito | 35(4)      | .031(.002)     | 91(3)    | 0      |         | .9873 |
| <i>mdm34Δ</i>                | Cyt  | 50(5)      | .024(.003)     | 93(4)    | 0      | Fig. 4e | .9943 |
|                              | Nuc  | 22(3)      | .040(.004)**   | 106(4)*  | 0      |         | .9678 |
|                              | Mito | 43(4)      | .024(.002)     | 105(5)   | 0      |         | .9841 |
| WT                           | Cyt  | 154(5)     | .018(.001)     | 80(5)    | 43(5)  | Fig. 4g | .9871 |
|                              | Nuc  | 115(3)***  | .030(.003)***  | 85(4)    | 48(3)  |         | .9921 |
|                              | Mito | 145(6)     | .020(.002)     | 82(4)    | 45(6)  |         | .9808 |
| <i>psd1Δ</i>                 | Cyt  | 156(3)     | .019(.001)     | 80(3)    | 50(3)  | Fig. 4g | .9826 |
|                              | Nuc  | 106(5)***  | .033(.003)***  | 82(4)    | 45(5)  |         | .9863 |
|                              | Mito | 145(4)     | .023(.003)     | 84(3)    | 55(4)  |         | .9891 |
| WT                           | Cyt  | 83(4)      | .031(.002)     | 90(3)    | 19(4)  | Fig. 4i | .9860 |
|                              | Nuc  | 67(3)      | .039(.002)*    | 98(4)    | 16(3)  |         | .9738 |
|                              | Mito | 86(3)      | .032(.003)     | 90(2)    | 24(3)  |         | .9781 |
| <i>ypt7Δ</i>                 | Cyt  | 100(4)     | .032(.002)     | 99(3)    | 38(4)  | Fig. 4i | .9791 |
|                              | Nuc  | 94(3)      | .038(.002)*    | 100(4)   | 42(3)  |         | .9172 |
|                              | Mito | 101(3)     | .029(.003)     | 92(5)    | 32(3)  |         | .9206 |
| WT                           | Cyt  | 67(2)      | .031(.002)     | 88(4)    | 3(2)   | Fig. 4k | .9867 |
|                              | Nuc  | 59(2)*     | .038(.002)*    | 105(6)*  | 6(2)   |         | .9748 |
|                              | Mito | 65(3)      | .029(.003)     | 85(3)    | 1(3)   |         | .9791 |
| <i>vps39Δ</i>                | Cyt  | 75(3)      | .029(.003)     | 95(3)    | 6(3)   | Fig. 4k | .9836 |
|                              | Nuc  | 64(4)*     | .039(.002)**   | 104(5)   | 13(4)  |         | .9490 |
|                              | Mito | 81(4)      | .027(.002)     | 103(5)   | 7(4)   |         | .9699 |

**Fig. S1. Related to Fig. 2.** A 500  $\mu\text{M}$  dose of succinylacetone (SA) depletes (a) total heme and (b) heme-loading of the heme sensor, HS1, to values similar to heme deficient *hem1* $\Delta$  cells, which lack the 1<sup>st</sup> enzyme in the heme biosynthetic pathway. Moreover, the expression of cytosolic, nuclear, and mitochondrial HS1 do not affect steady-state cellular heme content. All data represent the mean  $\pm$  SD of triplicate cultures.

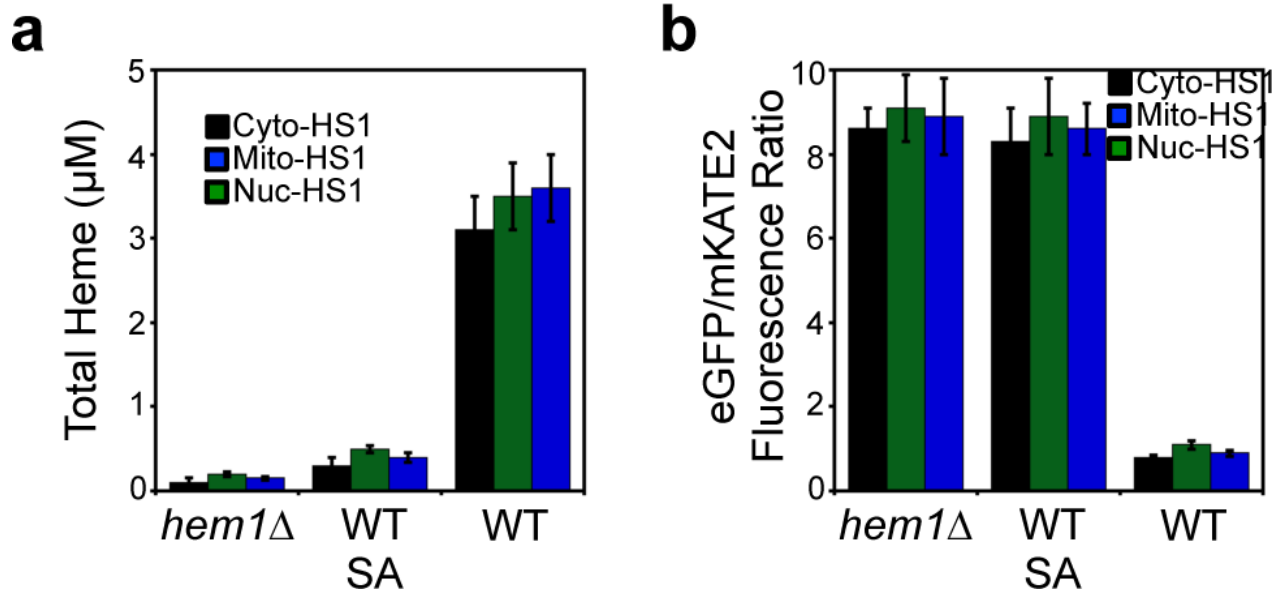

**Fig. S2. Related to Fig. 2.** Heme sensor expression in the indicated compartments do not perturb (a) the rates of heme synthesis or (b) heme trafficking dynamics to the cytosol. (a) WT cells expressing *GPD* driven cytosolic (Cyto, black), mitochondrial (Mito, blue), or nuclear (Nuc, green) HS1, or empty vector (EV, grey) were heme depleted with 500  $\mu$ M succinylacetone (SA) for 15 hours and then the cells were resuspended in fresh SC-LEU media lacking SA, where the re-synthesis of heme was monitored by harvesting  $2 \times 10^8$  cells every hour and analyzed for heme content as described in the **Method Details**. (b) The heme trafficking dynamics assay was conducted on cells expressing *ADH* (black), *TEF* (green) and *GPD* (blue) driven cytosolic HS1. Despite the  $\sim 10$ -fold increase in HS1 expression between *ADH* and *GPD* promoters, as measured by mKATE2 fluorescence in the right panel (c), cytosolic heme trafficking rates are virtually identical. All data represent the mean  $\pm$  SD of triplicate cultures.

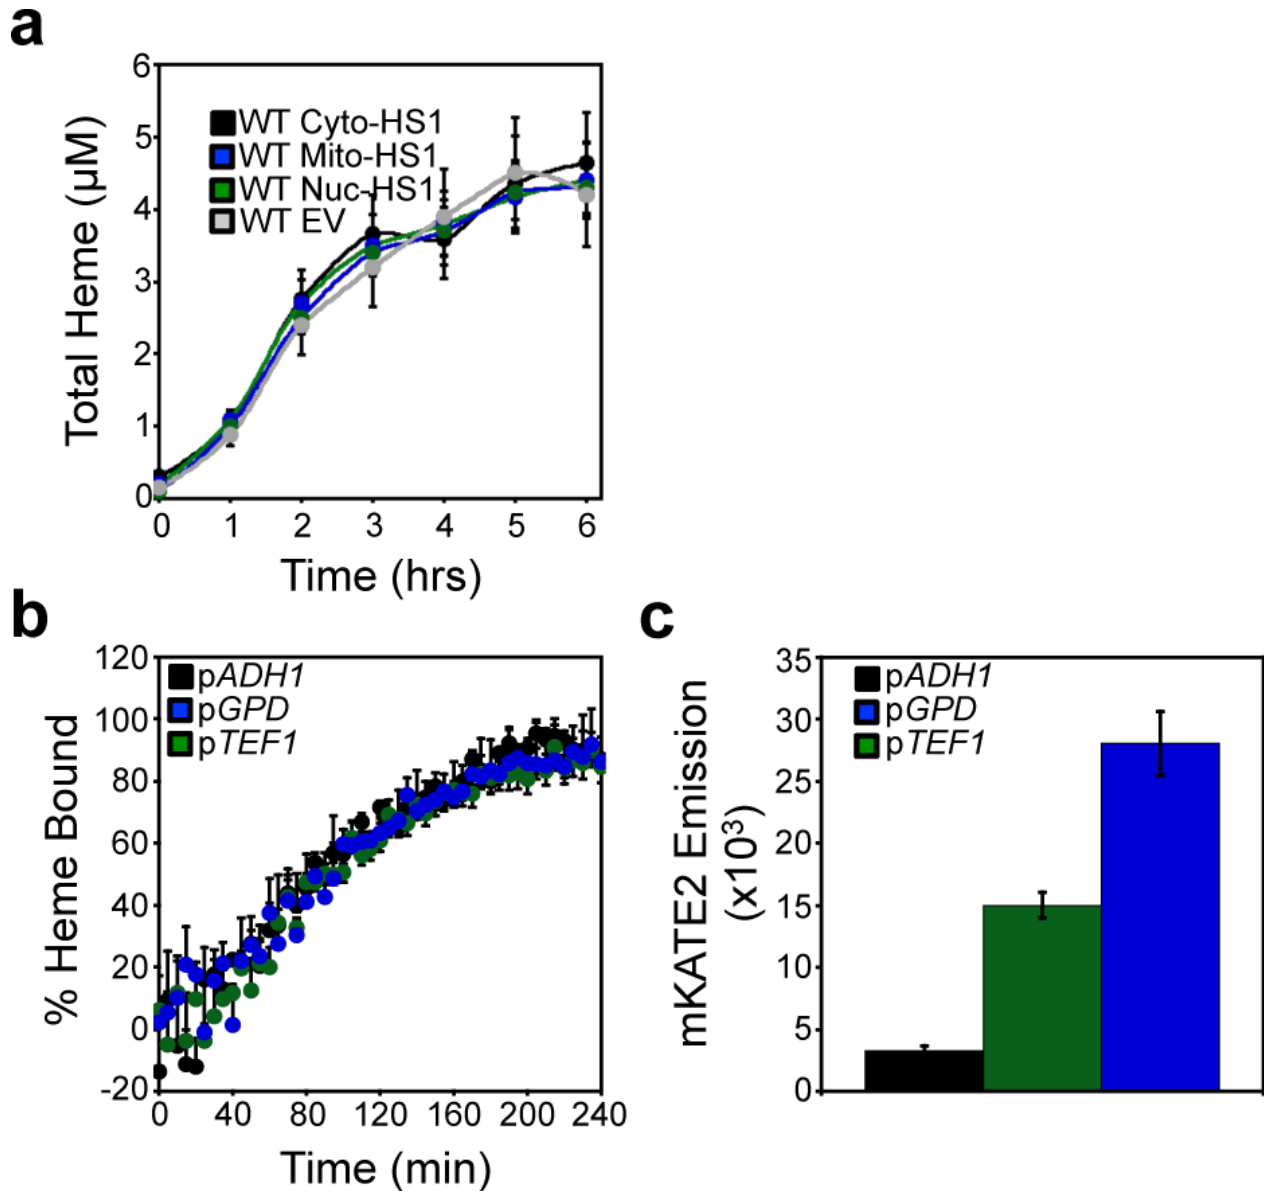

**Fig. S3. Related to Fig. 2.** Heme binding kinetics of cytosolic, nuclear, and mitochondrial-targeted HS1.  $2 \times 10^8$  exponential-phase WT cells expressing *GPD* driven cytosolic (Cyto, black), mitochondrial (Mito, blue), or nuclear (Nuc, green) HS1 were lysed in 500  $\mu\text{L}$  of PBS buffer containing 10 mM ascorbate and 0.1% Triton X-100. 100  $\mu\text{L}$  of the cell lysate was analyzed by fluorescence (ex. 488 nm, em. 510 nm; ex. 588 nm, em. 620 nm) over the indicated time period, and at time 0, an automatic dispenser pipetted 5  $\mu\text{L}$  of a 1 mM hemin chloride stock solution in DMSO, giving a final concentration of 50  $\mu\text{M}$  heme in the cell lysate. All data represent the mean  $\pm$  SD of triplicate cultures.

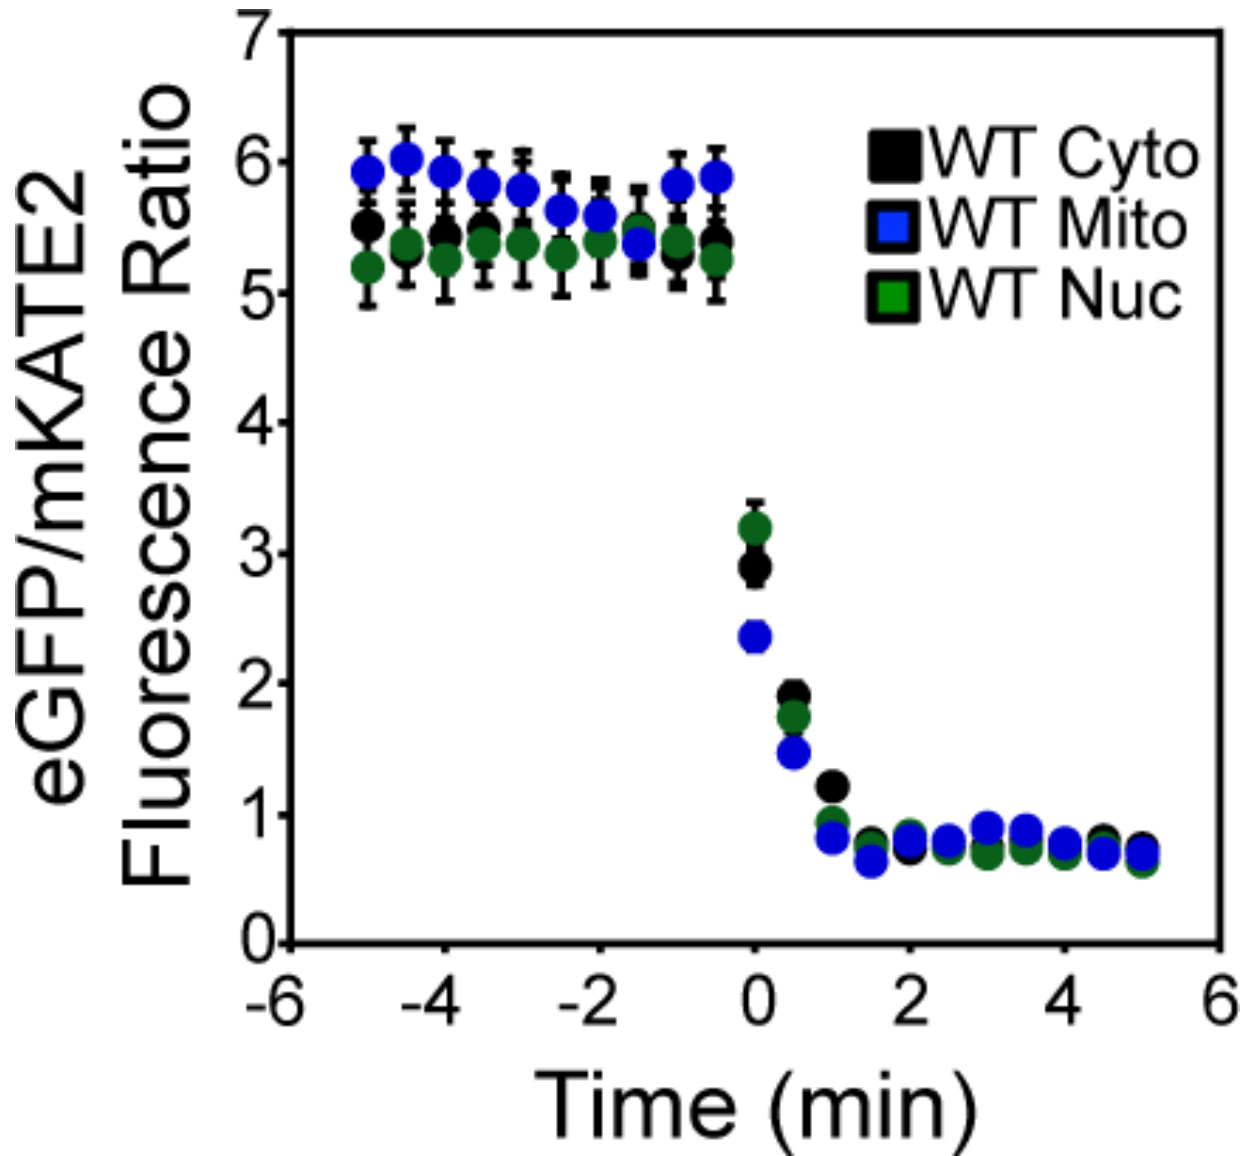

**Fig. S4. Related to Fig. 5 and Fig. 6.** The effects of *mgm1* $\Delta$  and *dnm1* $\Delta$  on steady-state HS1 heme loading and heme synthesis. **(a)** Cytosolic (Cyto), nuclear (Nuc), or mitochondrial (Mito) HS1 expressed in WT (black, gray), *dnm1* $\Delta$  (dark and light green), and *mgm1* $\Delta$  (dark and light blue) cells were cultured for 16 hours in SCE-LEU media with (+SA, dark colors) or without (-SA, light colors) 500  $\mu$ M succinylacetone (SA). Following growth and washing cells with ultrapure water, HS1 sensor fluorescence was measured in a 100  $\mu$ L suspension of 5 OD's/mL in PBS. **(b and c)** The rates of heme synthesis were measured in **(b)** *mgm1* $\Delta$  and **(c)** *dnm1* $\Delta$  cells by first heme depleting cells with 500  $\mu$ M SA for 15 hours and then re-initiating heme synthesis by re-suspending cells in media lacking SA.  $2 \times 10^8$  cells were harvested every hour and analyzed for heme content as described in the **Materials and Methods**. All data represent the mean  $\pm$  SD of triplicate cultures.

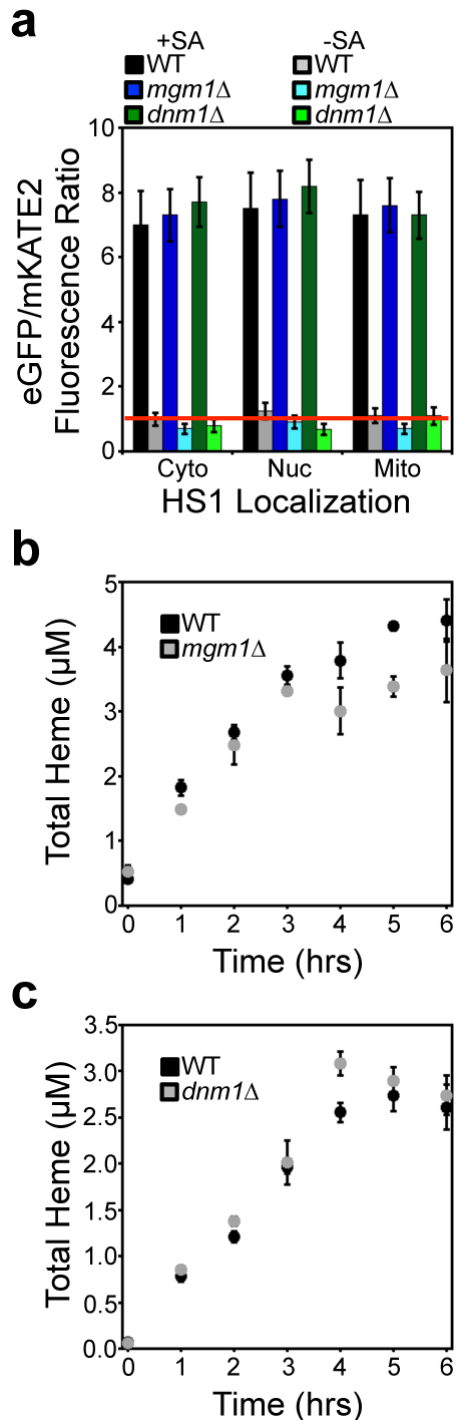

**Fig. S5. Related to strain validation in Materials and Methods.** Validation of the mitochondrial network morphology defects in yeast fission and fusion mutants. **(a)** Sampling and classification of mitochondrial network morphologies observed using Mitotracker staining of cells. **(b)** Histograms of mitochondrial network morphology in the fission and fusion mutants used throughout this study. Mutants defective in mitochondrial fission exhibit an elongated mitochondrial network. Mutants defective in mitochondrial fusion exhibit a punctate mitochondrial network. WT and *mgm1Δ dnm1Δ* cells tend to have a more equal distribution of elongated and punctate mitochondrial networks. The histograms were generated by analyzing ~50 cells per mutant. **(c)** Representative images of the mitochondrial network in the fission and fusion mutants utilized in this study. Scale bar: 5.0  $\mu\text{m}$ .



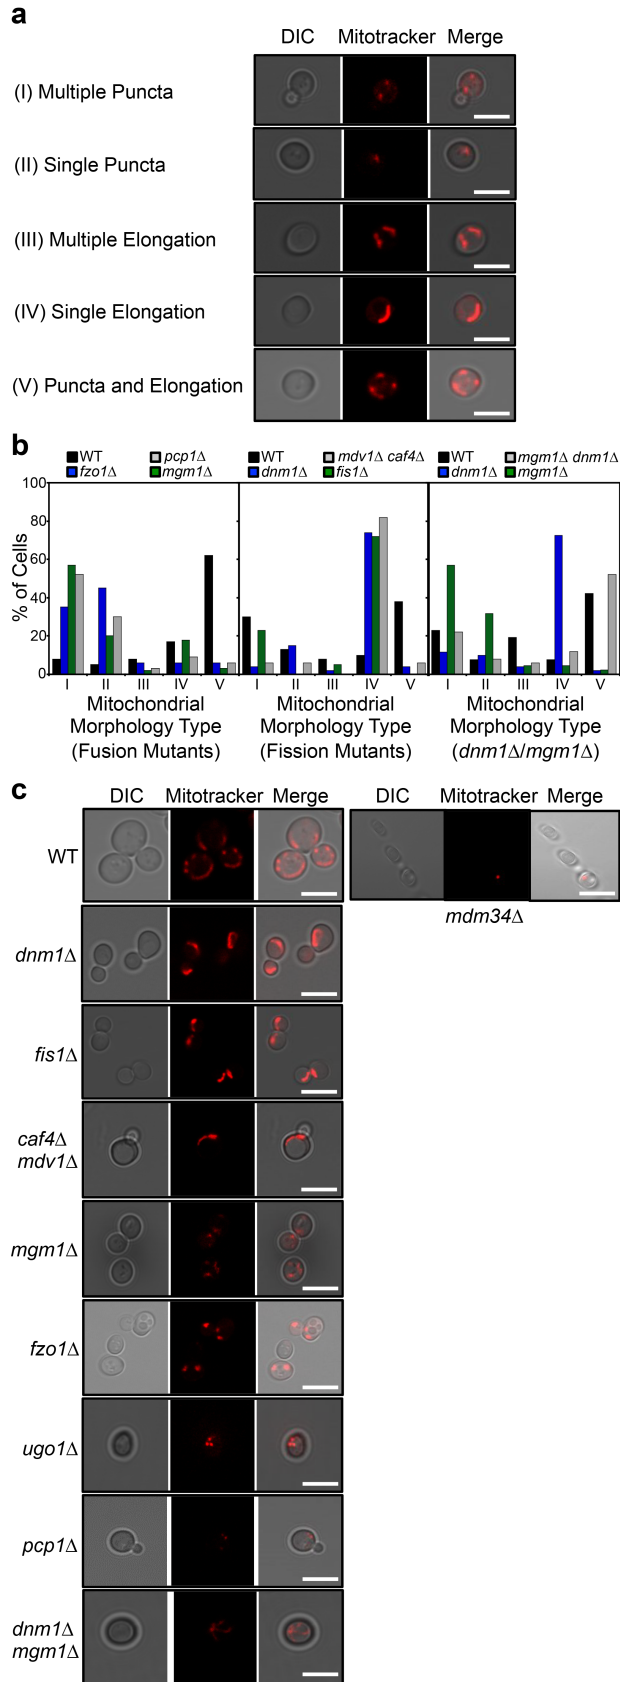

Supplement: joces-133-237917-s1.pdf [file joces-133-237917-s1.pdf]
